# Supplementary material for: Conventional versus Hepatic Arteriography and C-Arm CT-Guided Ablation of Liver Tumors (HepACAGA): A Comparative Analysis
Source: MDPI journal article supplement (doi:10.3390/cancers16101925), 2024-05-18
Supplement: s1 [file s1]

## Supplementary materials

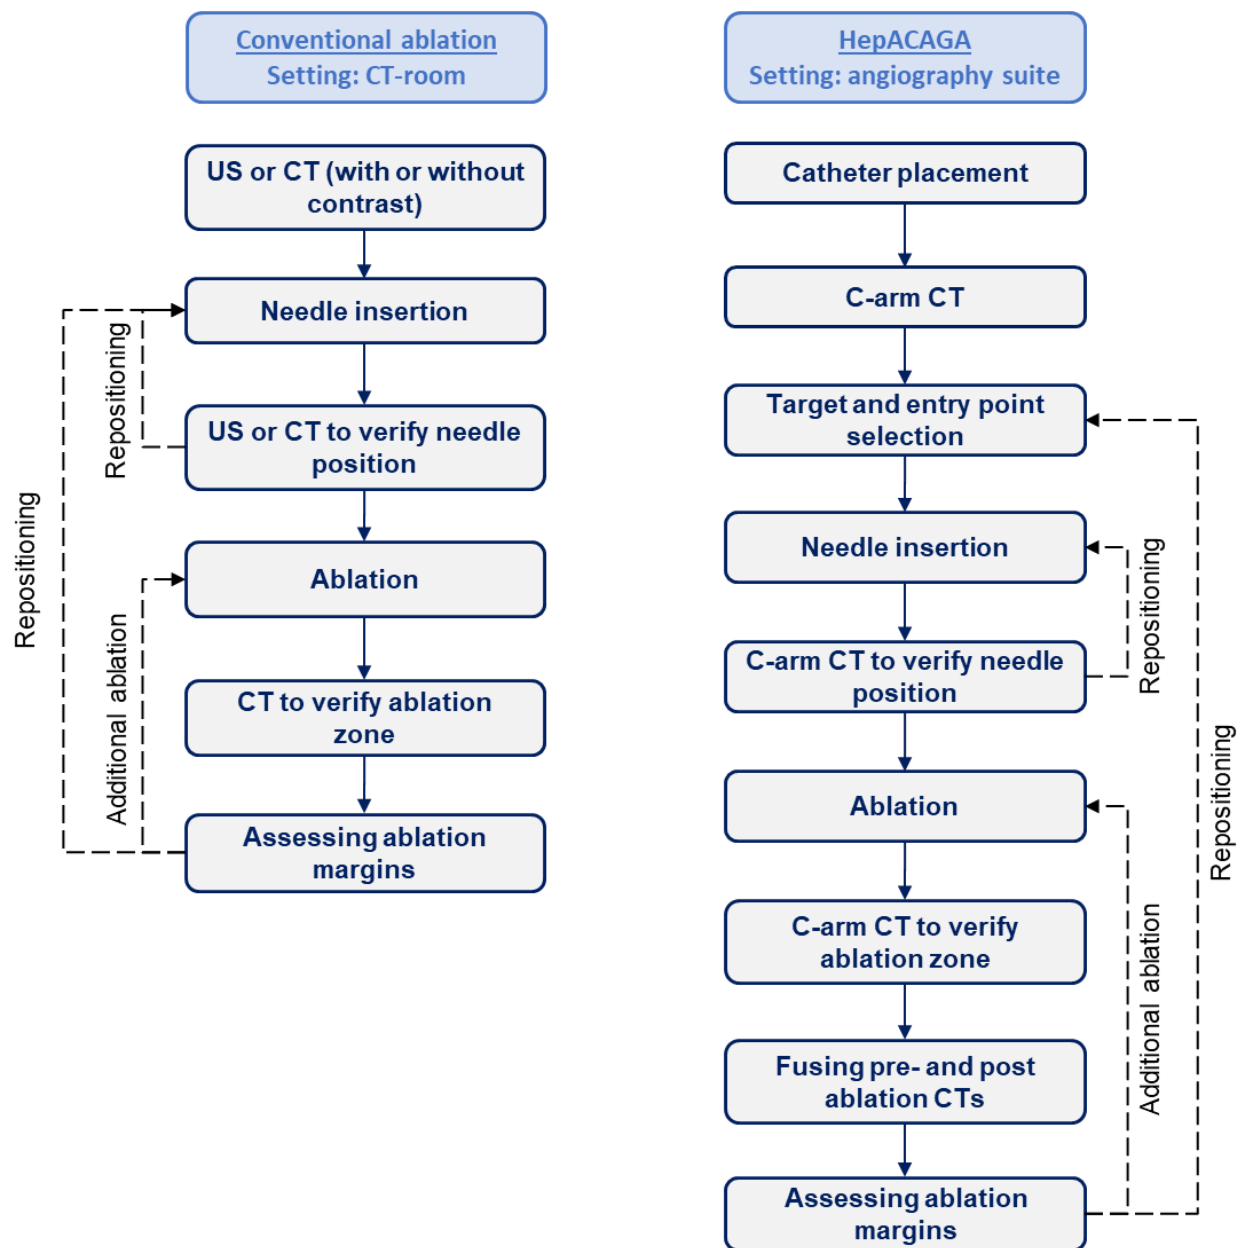

**Figure S1.** Flowchart of procedural steps involved in the conventional ablation method (left) and the HepACAGA technique (right).

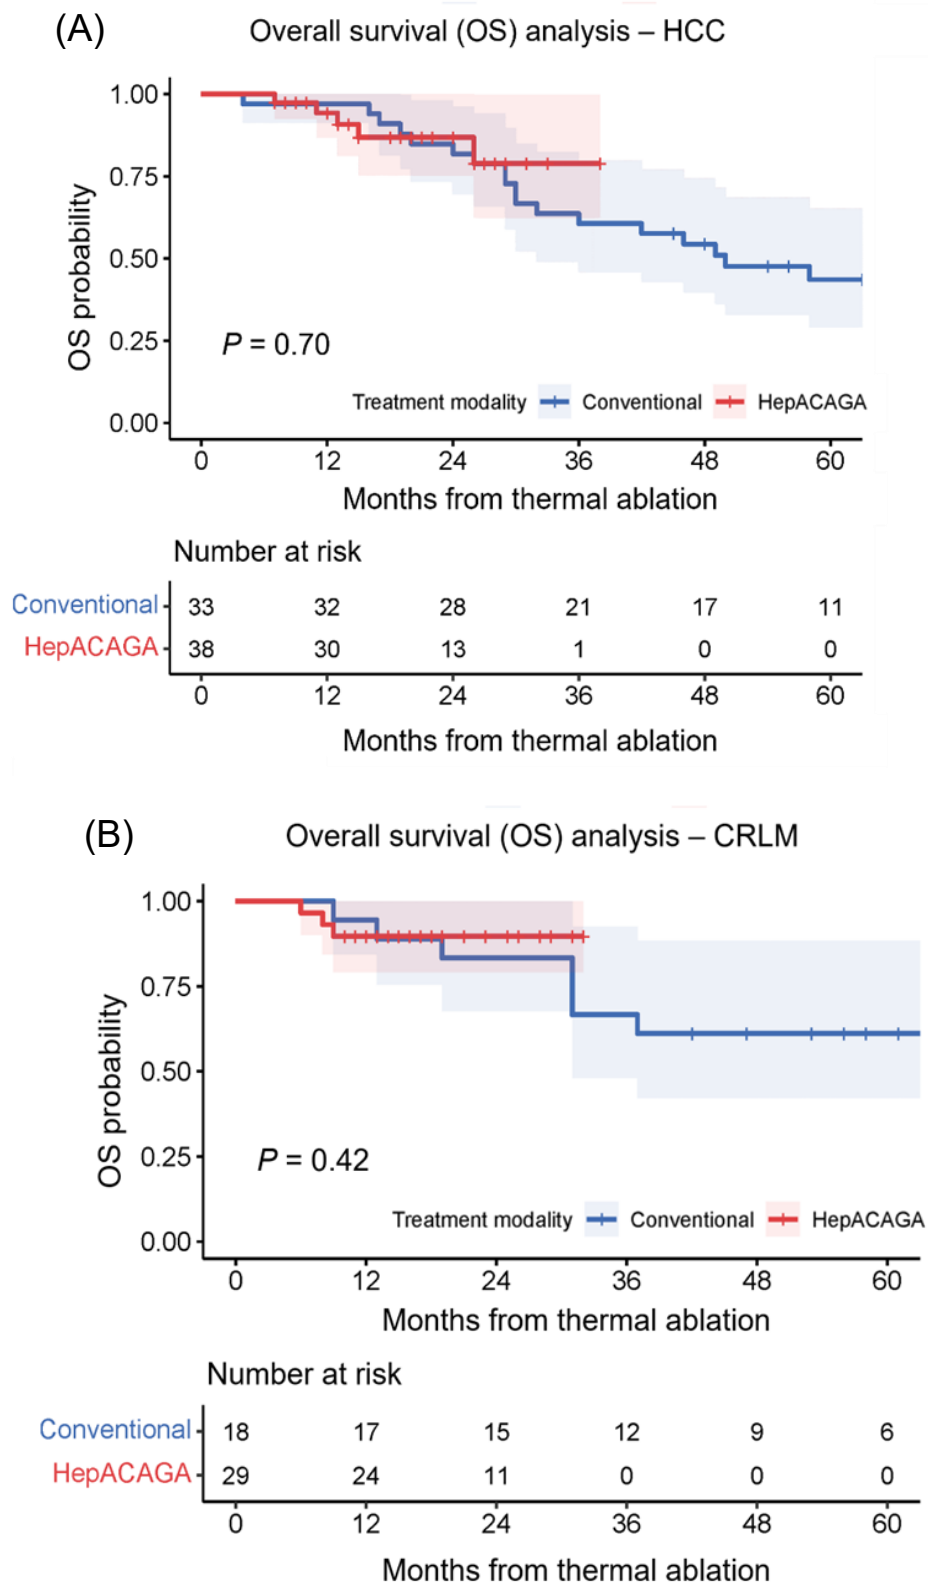

**Figure S2.** Kaplan–Meier survival curves illustrating the overall survival (OS) with 95% CI for both tumor types separately. Log-rank tests were used for comparison. The number at risk corresponds to either the number of HCC or CRLM present at each time point. (A) represents the HCC analysis; (B) demonstrates the CRLM analysis.
